# Supplementary material for: Metabolic Signatures Differentiate Rett Syndrome From Unaffected Siblings
Source: Front Integr Neurosci. 2020 Feb 25;14:7. doi: 10.3389/fnint.2020.00007 (PMC7052375; doi:10.3389/fnint.2020.00007)
Supplement: TABLE S7 — KEGG analysis name matching. [file Table_7.XLSX]

## Sheet: name_map
Query	Match	HMDB	PubChem	KEGG	SMILES	Comment
HMDB01847	Caffeine	HMDB0001847	2519	C07481	CN1C=NC2=C1C(=O)N(C(=O)N2C)C	1
HMDB01860	Paraxanthine	HMDB0001860	4687	C13747	CN1C=NC2=C1C(=O)N(C(=O)N2)C	1
HMDB02825	Theobromine	HMDB0002825	5429	C07480	CN1C=NC2=C1C(=O)NC(=O)N2C	1
HMDB94696	NA	NA	NA	NA	NA	0
HMDB0061115	NA	NA	NA	NA	NA	0
HMDB01991	7-Methylxanthine	HMDB0001991	68374	C16353	CN1C=NC2=C1C(=O)NC(=O)N2	1
HMDB00619	Cholic acid	HMDB0000619	221493	C00695	C[C@H](CCC(=O)O)[C@H]1CC[C@@H]2[C@@]1([C@H](C[C@H]3[C@H]2[C@@H](C[C@H]4[C@@]3(CC[C@H](C4)O)C)O)O)C	1
HMDB01886	3-Methylxanthine	HMDB0001886	70639	C16357	CN1C2=C(C(=O)NC1=O)NC=N2	1
HMDB00054	Bilirubin	HMDB0000054	5280352	C00486	CC1=C(NC(=C1CCC(=O)O)CC2=C(C(=C(N2)/C=C\3/C(=C(C(=O)N3)C)C=C)C)CCC(=O)O)/C=C\4/C(=C(C(=O)N4)C=C)C	1
HMDB02302	Indole-3-propionic acid	HMDB0002302	3744		C1=CC=C2C(=C1)C(=CN2)CCC(=O)O	1
HMDB02759	Androsterone sulfate	HMDB0002759	159663		C[C@]12CC[C@H](C[C@@H]1CC[C@@H]3[C@@H]2CC[C@]4([C@H]3CCC4=O)C)OS(=O)(=O)O	1
HMDB00518	Chenodeoxycholic acid	HMDB0000518	10133	C02528	C[C@H](CCC(=O)O)[C@H]1CC[C@@H]2[C@@]1(CC[C@H]3[C@H]2[C@@H](C[C@H]4[C@@]3(CC[C@H](C4)O)C)O)C	1
HMDB04072	4-Hydroxystyrene	HMDB0004072	62453	C05627	C=CC1=CC=C(C=C1)O	1
HMDB94656	NA	NA	NA	NA	NA	0
HMDB00711	Hydroxyoctanoic acid	HMDB0000711	94180		CCCCCCC(C(=O)O)O	1
HMDB12881	Acetylcarnosine	HMDB0012881	10221026		CC(=O)NCCC(=O)N[C@H](CC1=CN=CN1)C(=O)O	1
HMDB00365	Epiandrosterone	HMDB0000365	11055399	C07635	C[C@]12CC[C@@H](CC1CC[C@@H]3[C@@H]2CC[C@]4([C@H]3CCC4=O)C)O	1
HMDB04827	Proline betaine	HMDB0004827	115244	C10172	C[N+]1(CCC[C@H]1C(=O)[O-])C	1
HMDB00991	DL-2-Aminooctanoic acid	HMDB0000991	69522		CCCCCCC(C(=O)O)N	1
HMDB00755	Hydroxyphenyllactic acid	HMDB0000755	9378	C03672	C1=CC(=CC=C1CC(C(=O)O)O)O	1
HMDB01008	Biliverdin	HMDB0001008	5353439	C00500	CC\1=C(/C(=C/C2=C(C(=C(N2)/C=C\3/C(=C(C(=O)N3)C)C=C)C)CCC(=O)O)/N/C1=C/C4=NC(=O)C(=C4C)C=C)CCC(=O)O	1
HMDB00562	Creatinine	HMDB0000562	588	C00791	CN1CC(=O)N=C1N	1
HMDB00407	2-Hydroxy-3-methylbutyric acid	HMDB0000407	99823		CC(C)C(C(=O)O)O	1
HMDB00779	Phenyllactic acid	HMDB0000779	3848	C01479	C1=CC=C(C=C1)CC(C(=O)O)O	1
HMDB02712	1,5-Anhydrosorbitol	HMDB0002712	64960	C07326	C1[C@@H]([C@H]([C@@H]([C@H](O1)CO)O)O)O	1
HMDB00671	Indolelactic acid	HMDB0000671	92904	C02043	C1=CC=C2C(=C1)C(=CN2)CC(C(=O)O)O	1
HMDB00656	Cysteineglutathione disulfide	HMDB0000656	53477713		C(CC(=O)N[C@@H](CSSCC(C(=O)O)N)C(=O)NCC(=O)O)[C@@H](C(=O)O)N	1
HMDB61700	NA	NA	NA	NA	NA	0
HMDB01161	4-Trimethylammoniobutanoic acid	HMDB0001161	134	C01181	C[N+](C)(C)CCCC(=O)O	1
HMDB10386	LysoPC(18:2(9Z,12Z))	HMDB0010386	11005824	C04230	CCCCC/C=C\C/C=C\CCCCCCCC(=O)OC[C@H](COP(=O)([O-])OCC[N+](C)(C)C)O	1
HMDB94649	NA	NA	NA	NA	NA	0
HMDB0011341	PEP-16:0/18:1(11Z))	HMDB0011341	53480845		CCCCCCCCCCCCCC/C=C\OC[C@H](COP(=O)(O)OCCN)OC(=O)CCCCCCCCC/C=C\CCCCCC	1
HMDB00684	L-Kynurenine	HMDB0000684	161166	C00328	C1=CC=C(C(=C1)C(=O)C[C@@H](C(=O)O)N)N	1
HMDB00695	Ketoleucine	HMDB0000695	70	C00233	CC(C)CC(=O)C(=O)O	1
HMDB00177	L-Histidine	HMDB0000177	6274	C00135	C1=C(NC=N1)C[C@@H](C(=O)O)N	1
HMDB00517	L-Arginine	HMDB0000517	6322	C00062	C(C[C@@H](C(=O)O)N)CN=C(N)N	1
HMDB37847	NA	NA	NA	NA	NA	0
HMDB00131	Glycerol	HMDB0000131	753	C00116	C(C(CO)O)O	1
HMDB31057	(R)-2-Hydroxyhexadecanoic acid	HMDB0031057	92836		CCCCCCCCCCCCCCC(C(=O)O)O	1
HMDB62549	NA	NA	NA	NA	NA	0
HMDB01434	3-Methoxytyrosine	HMDB0001434	1670		COC1=C(C=CC(=C1)CC(C(=O)O)N)O	1
HMDB00092	Dimethylglycine	HMDB0000092	673	C01026	CN(C)CC(=O)O	1
HMDB61384	NA	NA	NA	NA	NA	0
HMDB02802	Cortisone	HMDB0002802	222786	C00762	C[C@]12CCC(=O)C=C1CC[C@@H]3[C@@H]2C(=O)C[C@]4([C@H]3CC[C@@]4(C(=O)CO)O)C	1
HMDB02925	8,11,14-Eicosatrienoic acid	HMDB0002925	5280581	C03242	CCCCC/C=C\C/C=C\C/C=C\CCCCCCC(=O)O	1
HMDB0002013	Butyrylcarnitine	HMDB0002013	439829	C02862	CCCC(=O)OC(CC(=O)[O-])C[N+](C)(C)C	1
HMDB61880	NA	NA	NA	NA	NA	0
HMDB11753	Iminodiacetic acid	HMDB0011753	8897	C19911	C(C(=O)O)NCC(=O)O	1
HMDB00064	Creatine	HMDB0000064	586	C00300	CN(CC(=O)O)C(=N)N	1
HMDB00008	2-Hydroxybutyric acid	HMDB0000008	11266	C05984	CCC(C(=O)O)O	1
HMDB00169	D-Mannose	HMDB0000169	18950	C00159	C([C@@H]1[C@H]([C@@H]([C@@H](C(O1)O)O)O)O)O	1
HMDB00243	Pyruvic acid	HMDB0000243	1060	C00022	CC(=O)C(=O)O	1
HMDB06344	Alpha-N-Phenylacetyl-L-glutamine	HMDB0006344	92258	C04148	C1=CC=C(C=C1)CC(=O)N[C@@H](CCC(=O)N)C(=O)O	1
HMDB05060	Eicosadienoic acid	HMDB0005060	6439848	C16525	CCCCC/C=C\C/C=C\CCCCCCCCCC(=O)O	1
HMDB00210	Pantothenic acid	HMDB0000210	988	C00864	CC(C)(CO)C(C(=O)NCCC(=O)O)O	1
HMDB00148	L-Glutamic acid	HMDB0000148	33032	C00025	C(CC(=O)O)[C@@H](C(=O)O)N	1
HMDB00532	Acetylglycine	HMDB0000532	10972		CC(=O)NCC(=O)O	1
HMDB00005	2-Ketobutyric acid	HMDB0000005	58	C00109	CCC(=O)C(=O)O	1
HMDB00191	L-Aspartic acid	HMDB0000191	5960	C00049	C([C@@H](C(=O)O)N)C(=O)O	1
HMDB00510	Aminoadipic acid	HMDB0000510	469	C00956	C(CC(C(=O)O)N)CC(=O)O	1
HMDB00760	Hyocholic acid	HMDB0000760	NA		[H][C@@]12CCC([C@H](C)CCC(O)=O)[C@@]1(C)CC[C@@]1([H])[C@@]2([H])[C@H](O)[C@H](O)[C@]2([H])C[C@H](O)CC[C@]12C	1
HMDB00036	Taurocholic acid	HMDB0000036	440567	C05122	CC(CCC(=O)NCCS(=O)(=O)O)C1CCC2C1([C@H](CC3C2[C@@H](C[C@H]4C3(CC[C@H](C4)O)C)O)O)C	1
HMDB01881	Propylene glycol	HMDB0001881	1030	C00583	CC(CO)O	1
HMDB00017	4-Pyridoxic acid	HMDB0000017	6723	C00847	CC1=NC=C(C(=C1O)C(=O)O)CO	1
HMDB29377	Piperine	HMDB0029377	638024	C03882	C1CCN(CC1)C(=O)/C=C/C=C/C2=CC3=C(C=C2)OCO3	1
HMDB00258	Sucrose	HMDB0000258	5988	C00089	C([C@@H]1[C@H]([C@@H]([C@H]([C@H](O1)O[C@]2([C@H]([C@@H]([C@H](O2)CO)O)O)CO)O)O)O)O	1
HMDB00222	L-Palmitoylcarnitine	HMDB0000222	11953816	C02990	CCCCCCCCCCCCCCCC(=O)O[C@H](CC(=O)[O-])C[N+](C)(C)C	1
HMDB0008659	PC(22:5(4Z,7Z,10Z,13Z,16Z)/16:0)	HMDB0008659	53479281	C00157	CCCCCCCCCCCCCCCC(=O)O[C@H](COC(=O)CC/C=C\C/C=C\C/C=C\C/C=C\C/C=C\CCCCC)COP(=O)([O-])OCC[N+](C)(C)C	1
HMDB10379	LysoPC(14:0)	HMDB0010379	460604	C04230	CCCCCCCCCCCCCC(=O)OC[C@H](COP(=O)([O-])OCC[N+](C)(C)C)O	1
HMDB00625	Gluconic acid	HMDB0000625	10690	C00257	C([C@H]([C@H]([C@@H]([C@H](C(=O)O)O)O)O)O)O	1
HMDB61699	NA	NA	NA	NA	NA	0
HMDB00725	4-Hydroxyproline	HMDB0000725	5810	C01157	C1[C@H](CN[C@@H]1C(=O)O)O	1
HMDB00714	Hippuric acid	HMDB0000714	464	C01586	C1=CC=C(C=C1)C(=O)NCC(=O)O	1
HMDB00094	Citric acid	HMDB0000094	311	C00158	C(C(=O)O)C(CC(=O)O)(C(=O)O)O	1
HMDB00357	3-Hydroxybutyric acid	HMDB0000357	441	C01089	CC(CC(=O)O)O	1
HMDB33433	(S)-Homostachydrine	HMDB0033433	441447	C08283	C[N+]1(CCCC[C@H]1C(=O)[O-])C	1
HMDB01015	N-Formyl-L-methionine	HMDB0001015	6995182	C03145	CSCC[C@H](C(=O)O)NC=O	1
HMDB00159	L-Phenylalanine	HMDB0000159	6140	C00079	C1=CC=C(C=C1)C[C@@H](C(=O)O)N	1
HMDB00767	Pseudouridine	HMDB0000767	15047	C02067	C1=C(C(=O)NC(=O)N1)[C@H]2[C@@H]([C@@H]([C@H](O2)CO)O)O	1
HMDB00122	D-Glucose	HMDB0000122	5793	C00031	C([C@@H]1[C@H]([C@@H]([C@H](C(O1)O)O)O)O)O	1
HMDB15109	Edetic Acid	HMDB0015109	6049	C00284	C(CN(CC(=O)O)CC(=O)O)N(CC(=O)O)CC(=O)O	1
HMDB00574	L-Cysteine	HMDB0000574	5862	C00097	C([C@@H](C(=O)O)N)S	1
HMDB00705	Hexanoylcarnitine	HMDB0000705	6426853		CCCCCC(=O)OC(CC(=O)[O-])C[N+](C)(C)C	1
HMDB00157	Hypoxanthine	HMDB0000157	790	C00262	C1=NC2=C(N1)C(=O)N=CN2	1
HMDB0061714	Docosadienoate (22:2n6)	HMDB0061714	NA		CCCCCC=CCC=CCCCCCCCCCCCC(O)=O	1
HMDB00208	Oxoglutaric acid	HMDB0000208	51	C00026	C(CC(=O)O)C(=O)C(=O)O	1
HMDB01348	SM(d18:1/18:0)	HMDB0001348	5283588	C00550	CCCCCCCCCCCCCCCCCC(=O)N[C@@H](COP(=O)(O)OCC[N+](C)(C)C)[C@@H](/C=C/CCCCCCCCCCCCC)O	1
HMDB00063	Cortisol	HMDB0000063	657311	C00735	C[C@]12CCC(=O)C=C1CC[C@@H]3[C@@H]2[C@H](C[C@]4([C@H]3CC[C@]4(C(=O)CO)O)C)O	1
HMDB00271	Sarcosine	HMDB0000271	1088	C00213	CNCC(=O)O	1
HMDB00187	L-Serine	HMDB0000187	5951	C00065	C([C@@H](C(=O)O)N)O	1
HMDB00123	Glycine	HMDB0000123	750	C00037	C(C(=O)O)N	1
HMDB03374	D-Ornithine	HMDB0003374	71082	C00515	C(C[C@H](C(=O)O)N)CN	1
HMDB00192	L-Cystine	HMDB0000192	67678	C00491	C([C@@H](C(=O)O)N)SSC[C@@H](C(=O)O)N	1
