# Supplementary material for: Metabolic Signatures Differentiate Rett Syndrome From Unaffected Siblings
Source: Front Integr Neurosci. 2020 Feb 25;14:7. doi: 10.3389/fnint.2020.00007 (PMC7052375; doi:10.3389/fnint.2020.00007)
Supplement: TABLE S10 — Significant metabolite features. [file Table_10.XLSX]

## Sheet: Supplemental Table 2
Super Pathway	Sub Pathway	Biochemical Name	Fold Change (RTT/Sibling)	p-value (raw)	FDR
Amino Acid	Alanine and Aspartate Metabolism	aspartate	1.7613	0.012529	0.09989
	Creatine Metabolism	creatinine	0.74543	1.7912e-05	0.001321
		creatine	1.3336	7.3616e-05	0.0027146
	Glutamate Metabolism	glutamate	1.5511	0.01525	0.102
	Glutathione Metabolism	cysteine-glutathione disulfide	0.79432	0.019819	0.10827
	Glycine, Serine and Threonine Metabolism	N-acetylglycine	1.5862	0.00047639	0.0087834
		dimethylglycine	1.2383	0.0044024	0.048673
		sarcosine	1.2988	0.052522	0.22395
		serine	1.363	0.056483	0.22825
		glycine	1.4373	0.091622	0.28754
	Histidine Metabolism	histidine	0.87799	0.013574	0.102
	Leucine, Isoleucine and Valine Metabolism	alpha-hydroxyisovalerate	0.74622	0.0030104	0.035523
		4-methyl-2-oxopentanoate	0.87183	0.01563	0.102
	Lysine Metabolism	2-aminoadipate	1.7983	0.0018662	0.024129
	Methionine, Cysteine, SAM and Taurine Metabolism	2-hydroxybutyrate	1.384	0.0105	0.091099
		alpha-ketobutyrate	1.6369	0.023919	0.12379
		cystine	1.577	0.05374	0.22395
		cysteine	1.1455	0.058651	0.23069
		N-formylmethionine	0.92873	0.063125	0.24472
	Phenylalanine and Tyrosine Metabolism	3-4-hydroxyphenyllactate	0.71231	1.3242e-06	0.00024314
		phenyllactate	0.74645	0.0018812	0.024129
		3-methoxytyrosine	1.2032	0.014386	0.102
		phenylacetylglutamine	1.394	0.018873	0.1065
		phenylalanine	0.93626	0.072178	0.26616
	Polyamine Metabolism	acisoga	1.2535	0.0049781	0.050979
	Tryptophan Metabolism	tryptophan betaine	0.3932	0.00013246	0.0039076
		indolelactate	0.78272	0.00037751	0.0074244
		indolepropionate	0.57229	0.0051843	0.050979
		kynurenine	0.85678	0.0087533	0.080694
		C-glycosyltryptophan	1.0833	0.021155	0.11347
	Urea cycle; Arginine and Proline Metabolism	N-methyl proline	0.38863	0.015901	0.102
		arginine	0.89764	0.033567	0.15718
		ornithine	1.4789	0.0539	0.22395
		trans-4-hydroxyproline	0.88095	0.067643	0.25259
Carbohydrate	Disaccharides and Oligosaccharides	sucrose	0.765	0.057894	0.23069
	Fructose, Mannose and Galactose Metabolism	mannose	1.392	0.0014282	0.020062
	Glycolysis, Gluconeogenesis, and Pyruvate Metabolism	1,5-anhydroglucitol	0.7767	0.010387	0.091099
		pyruvate	1.3929	0.0187	0.1065
		glucose	1.0884	0.077304	0.27462
Cofactors and Vitamins	Hemoglobin and Porphyrin Metabolism	bilirubin (Z,Z)	0.56477	0.00079027	0.012952
		bilirubin (E,E)	0.70702	0.0051205	0.050979
		biliverdin	0.74516	0.024731	0.12416
	Pantothenate	pantothenate	1.4922	0.012127	0.099376
	Vitamin B6 Metabolism	pyridoxate	6.9517	0.0011276	0.016632
Energy	TCA Cycle	citrate	0.90793	0.06553	0.24784
		alpha-ketoglutarate	1.2353	0.086852	0.27927
Lipid	Carnitine Metabolism	deoxycarnitine	0.80851	0.00033008	0.0069553
	Fatty Acid Metabolism	butyrylcarnitine	1.3081	0.022619	0.11915
	Acyl Carnitine Metabolism	hexanoylcarnitine	1.2161	0.087095	0.27927
		palmitoylcarnitine	0.80176	0.096231	0.29882
	Fatty Acid, Amino	2-aminooctanoate	0.6652	0.00021622	0.0053155
	Fatty Acid, Amino	2-aminoheptanoate	0.84805	0.01469	0.102
	Fatty Acid, Monohydroxy	2-hydroxyoctanoate	0.65572	0.00026104	0.0059236
		2-hydroxypalmitate	1.1601	0.00087006	0.013509
		2-hydroxydecanoate	0.64085	0.0024816	0.030503
		2-hydroxystearate	1.1717	0.0044548	0.048673
	Glycerolipid Metabolism	glycerol	1.1526	0.035864	0.16277
	Ketone Bodies	3-hydroxybutyrate	0.91912	0.081959	0.27734
	Lysolipid	1-linoleoylglycerophosphocholine	0.81713	0.0087213	0.080694
		2-linoleoylglycerophosphocholine	0.80163	0.013246	0.102
		1-palmitoylplasmenylethanolamine	0.85363	0.032688	0.15553
		1-myristoylglycerophosphocholine	0.8154	0.055598	0.2278
		2-arachidonoylglycerophosphocholine	0.87004	0.083671	0.27734
		2-palmitoylglycerophosphocholine	0.81054	0.085978	0.27927
	Polyunsaturated Fatty Acid	dihomo-linolenate	1.2794	0.019134	0.1065
		dihomo-linoleate	1.4213	0.024832	0.12416
		docosadienoate	1.2252	0.081967	0.27734
	Primary Bile Acid Metabolism	chenodeoxycholate	0.63739	0.00068552	0.011896
		taurocholate	2.3267	0.011653	0.09822
		cholate	0.41931	0.01404	0.102
	Secondary Bile Acid Metabolism	glycohyocholate	2.1965	0.028871	0.13962
	Sphingolipid Metabolism	stearoyl sphingomyelin	1.2396	0.073758	0.26862
	Steroid	cortisone	1.2549	0.016541	0.10382
		androsterone sulfate	0.61068	0.018771	0.1065
		andro steroid monosulfate 2	2.4178	0.018532	0.1065
		epiandrosterone sulfate	0.6634	0.035339	0.16277
		cortisol	1.2575	0.053533	0.22395
Nucleotide	Purine Metabolism	hypoxanthine	1.2238	0.075794	0.27267
	Pyrimidine Metabolism	N-acetyl-beta-alanine	1.3183	0.017073	0.10493
		pseudouridine	1.0695	0.088914	0.28204
Peptide	Dipeptide Derivative	N-acetylcarnosine	0.66172	3.8238e-05	0.0019868
Xenobiotics	Benzoate Metabolism	4-vinylphenol sulfate	0.63995	0.00016891	0.0045299
		hippurate	0.88449	0.079128	0.27462
	Chemical	1,2-propanediol	3.2543	0.025851	0.1271
		iminodiacetate	1.3288	0.038568	0.17239
		EDTA	1.1348	0.078622	0.27462
	Food Component/Plant	stachydrine	0.66373	0.015904	0.102
		gluconate	0.84914	0.052655	0.22395
		piperine	0.53787	0.063877	0.24472
		homostachydrine	0.92669	0.083147	0.27734
	Xanthine Metabolism	theobromine	0.31122	1.6484e-06	0.00024314
		paraxanthine	0.2913	8.1387e-06	0.00080031
		caffeine	0.26479	4.041e-05	0.0019868
		7-methylxanthine	0.41066	5.3072e-05	0.0022366
		3-methylxanthine	0.49069	0.00010002	0.0032784
	Increased (p<0.05)	Decreased (p<0.05)		p<0.05
	Increased (p<0.1)	Decreased (p<0.01)		p<0.01
